# Supplementary material for: Extracellular Soluble Membranes from Retinal Pigment Epithelial Cells Mediate Apoptosis in Macrophages
Source: MDPI journal article supplement (doi:10.3390/cells10051193), 2021-05-13
Supplement: s1 [file s1]

## Supplementary Materials

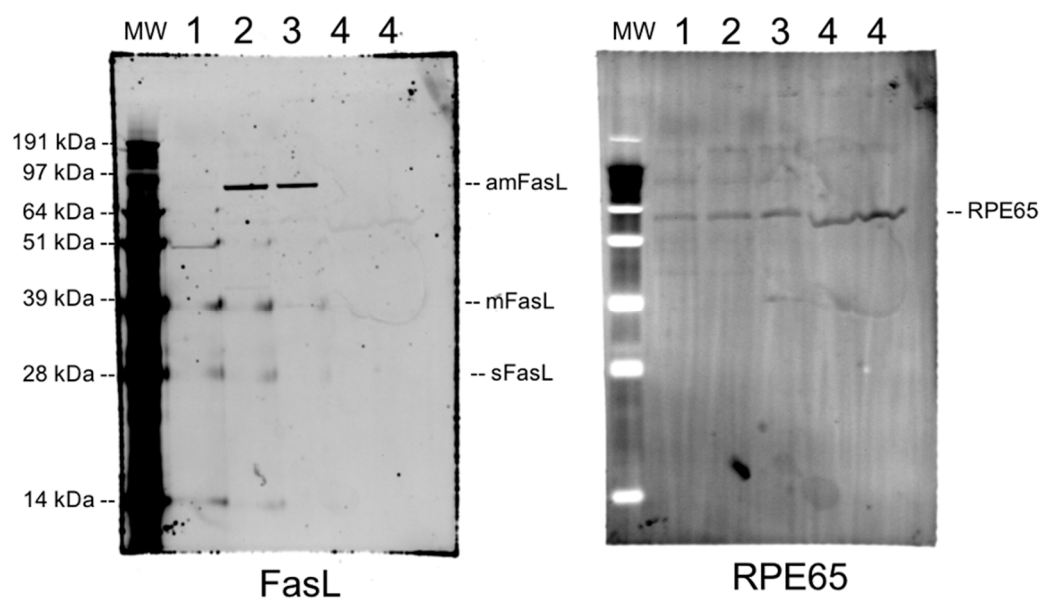

**Supplemental Figure S1.** Full images of the immunoblot presented in Fig. 3. The ESMs from RPE eyecups from eyes that were naive (lane 2) or with EAU (lane 3). ARPE-19 ESMs (lanes 4), and primary mouse-RPE cell lysate (lane 1) were assayed. MW = molecular weight markers.
